# Supplementary material
Source: Springer Nature journal article supplement (https://www.springermedizin.de/resource/supplementary/13047_2012_465_MOESM2_ESM.pdf/9663708)

Difference APEC session 1 and session 2

10  
5  
0  
-5  
-10  
-15

0 10 20 30 40

Average APEC session 1 and session 2

+1.96 SD  
8.75  
Mean  
-0.48  
-1.96 SD  
-9.69

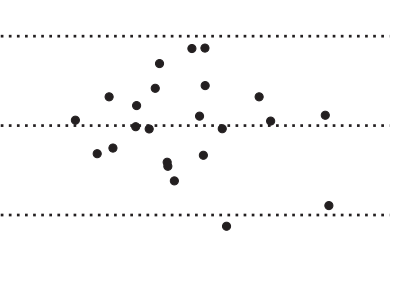

Supplement: MOESM2 [file 9663708]
